# Supplementary material
Source: PubMed Central journal article supplement (PMC4874532)
Supplement: NIHMS770791-supplement-1.pdf [file NIHMS770791-supplement-1.pdf]

| <b>Probe</b>                  | <b>Catalog Number</b> |
|-------------------------------|-----------------------|
| <i>IL17A</i>                  | Hs00936345_m1         |
| <i>FOXP3</i>                  | Hs01085834_m1         |
| <i>Tbet</i>                   | Hs00203436_m1         |
| <i>Rorc</i>                   | Hs01076112_m1         |
| <i>Gata3</i>                  | Hs00231122_m1         |
| <i>Ror<math>\alpha</math></i> | Hs00536545_m1         |
| <i>Tgf<math>\beta</math></i>  | Hs00998133_m1         |
| <i>PD1</i>                    | Hs00169472_m1         |
| <i>PDL1</i>                   | Hs00204257_m1         |
| <i>Tim3</i>                   | Hs00958618_m1         |
| <i>Ccr5</i>                   | Hs00152917_m1         |
| <i>Cxcr3</i>                  | Hs00171041_m1         |
| <i>IL4</i>                    | Hs00929862_m1         |
| <i>IL5</i>                    | Hs99999031_m1         |
| <i>IL10</i>                   | Hs00961622_m1         |
| <i>IL13</i>                   | Hs00174379_m1         |
| <i>Lag3</i>                   | Hs00158563_m1         |
| <i>Klf5</i>                   | Hs00156145_m1         |
| <i>IL23R</i>                  | Hs00332759_m1         |
| <i><math>\beta</math>2m</i>   | Hs00152917_m1         |

SUPPLEMENTAL FIGURE 1: TaqMan Probes used for qRT-PCR.

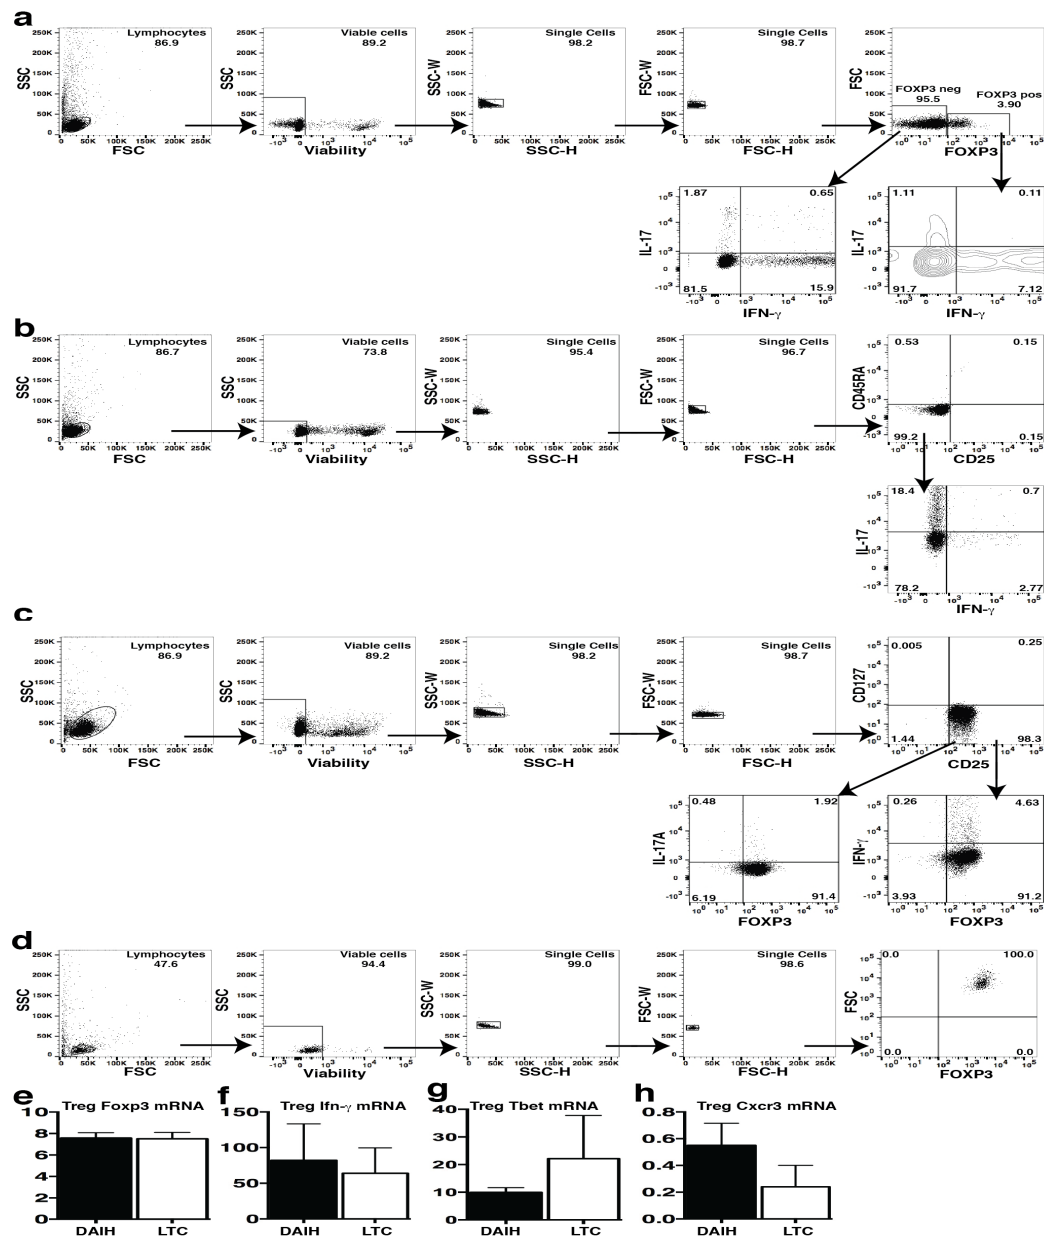

SUPPLEMENTARY FIGURE 2A-H: Gating strategy for sorted T cell subsets. FOXP3 purity, mRNA expression of FOXP3 of Tregs. Total CD4<sup>+</sup> T cells were isolated by negative selection and stained for fluorescence-activated cell sorting (FACS) with the following antibodies: anti-CD45RA, CD25, and CD127. The Treg (CD4<sup>+</sup>CD25<sup>hi</sup>CD127<sup>low/neg</sup>), Tmemory (CD4<sup>+</sup>CD25<sup>low/neg</sup>CD45RA<sup>-</sup>) and Tnaive (CD4<sup>+</sup>CD25<sup>low/neg</sup>CD45RA<sup>+</sup>) populations were sorted on a FACS Aria and stimulated with phorbol-12-myristate-13-acetate (PMA) and ionomycin for 4-hours and intracellular staining of IFN- $\gamma$ , IL-17A and FOXP3 was performed. A small fraction of the sorted Tregs was used for purity analysis and intracellular staining for FOXP3 was performed. RNA was isolated from the stimulated T cell populations and subjected to quantification of mRNA expression levels by RT-PCR. A) Forward and side scatter identified lymphocyte population; viable cells were gated on, single cells were next gated on using FSC-W vs. FSC-H and SSC-W vs. SSC-H, next FOXP3<sup>+</sup> and FOXP3<sup>-</sup> cells were gated on and of these, IFN- $\gamma$  vs. IL-17 secretion identified. Gate placement determined using unstimulated sample. B) Forward and side scatter identified lymphocyte population; viable cells were gated on, single cells were next gated on using FSC-W vs. FSC-H and SSC-W vs. SSC-H, next CD45RA<sup>-</sup> and CD25<sup>-</sup> cells were gated on and of these, IFN- $\gamma$  vs. IL-17 secretion identified. Gate placement determined using unstimulated sample. C) Forward and side scatter identified lymphocyte population; viable cells were gated on, single cells were next gated on using FSC-W vs. FSC-H and SSC-W vs. SSC-H, next CD25<sup>hi</sup> and CD127<sup>lo</sup> cells were gated on and of these, FOXP3<sup>+</sup> cells secreting IFN- $\gamma$ /IL-17 were identified. Gate placement determined using unstimulated sample. D) Forward and side scatter identified lymphocyte population; viable cells were gated on, single cells were next gated on using FSC-W vs. FSC-H and SSC-W vs. SSC-H, and of these, CD25<sup>hi</sup> and FOXP3<sup>+</sup> cells were identified. E) Similar FOXP3 mRNA expression in Tregs isolated from subjects with de novo autoimmune hepatitis (dAIH) (n=4) compared to liver transplanted subjects without de novo autoimmune hepatitis (LTC) (n=4). F) IFN- $\gamma$  mRNA expression not significantly different in Tregs isolated from subjects with dAIH (n=9) vs. LTC (n=9). G) TBET mRNA expression not significantly different in Tregs isolated from subjects with dAIH (n=9) vs. LTC (n=9). H) CXCR3 mRNA expression not significantly different in Tregs isolated from subjects with dAIH (n=4) vs. LTC (n=5).

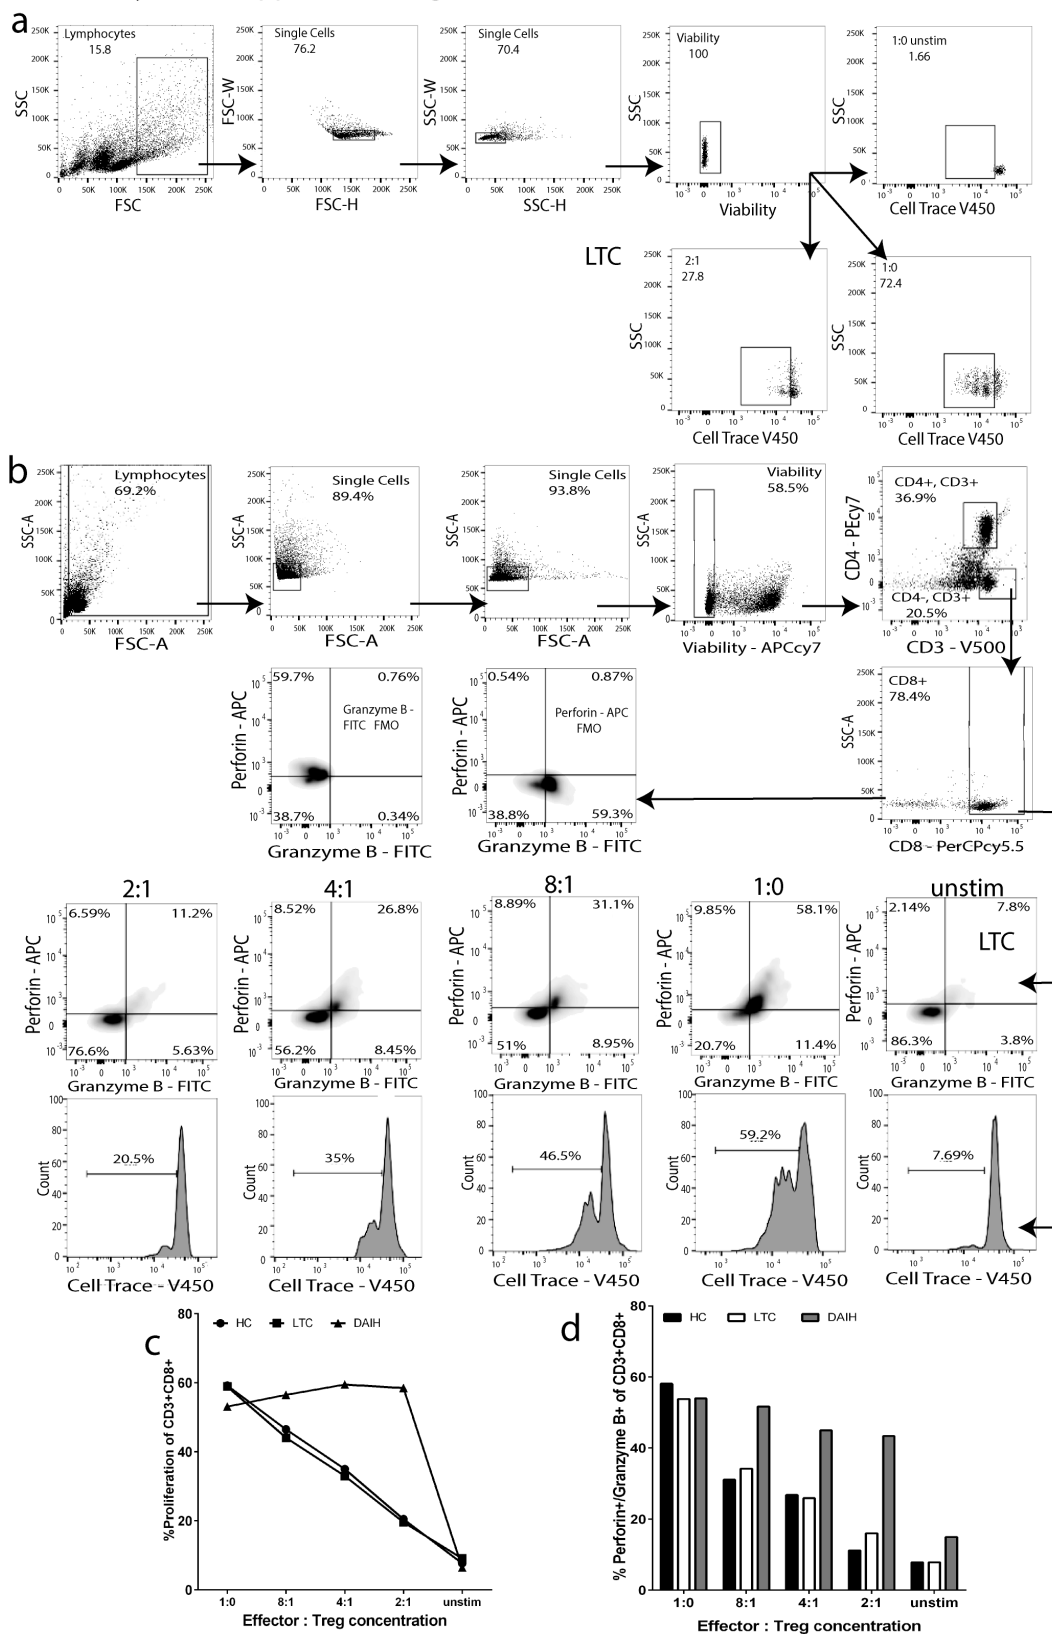

SUPPLEMENTARY FIGURE 3: Gating strategy for suppressor assay. Sorted Tregs were co-cultured with CFSE-labeled effector (responder) CD4+CD25-CD127+ T cells at 1:1, 2:1, 4:1, 8:1 T responder:Treg ratio and proliferation of viable responder T cells was analyzed on a LSR II flow cytometer. For the CD8 T cell cytolytic function assay, Tregs were co-cultured with Cell Trace V450-labeled total PBMCs at a ratio of 1:2, 1:4, and 1:8. A-B) Forward and side scatter identified lymphocyte population; single cells were next gated on using FSC-W vs. FSC-H and SSC-W vs. SSC-H, viable cells were gated on, and of these, CFSE vs. SSC-A identified. Gate placement determined using unstimulated sample. For perforin/granzyme B, gate placement determined using FMO. C-D) Tregs from a subject with de novo autoimmune hepatitis suppress CD8 T cell proliferation less efficiently compared to sorted Tregs from a healthy non-transplanted subject and a liver transplanted subject without de novo autoimmune hepatitis (LTC). They similarly suppress perforin and granzyme B secretion from CD8 T cells less efficiently compared to sorted Tregs from a healthy non-transplanted subject and liver transplanted subject without de novo autoimmune hepatitis (LTC).

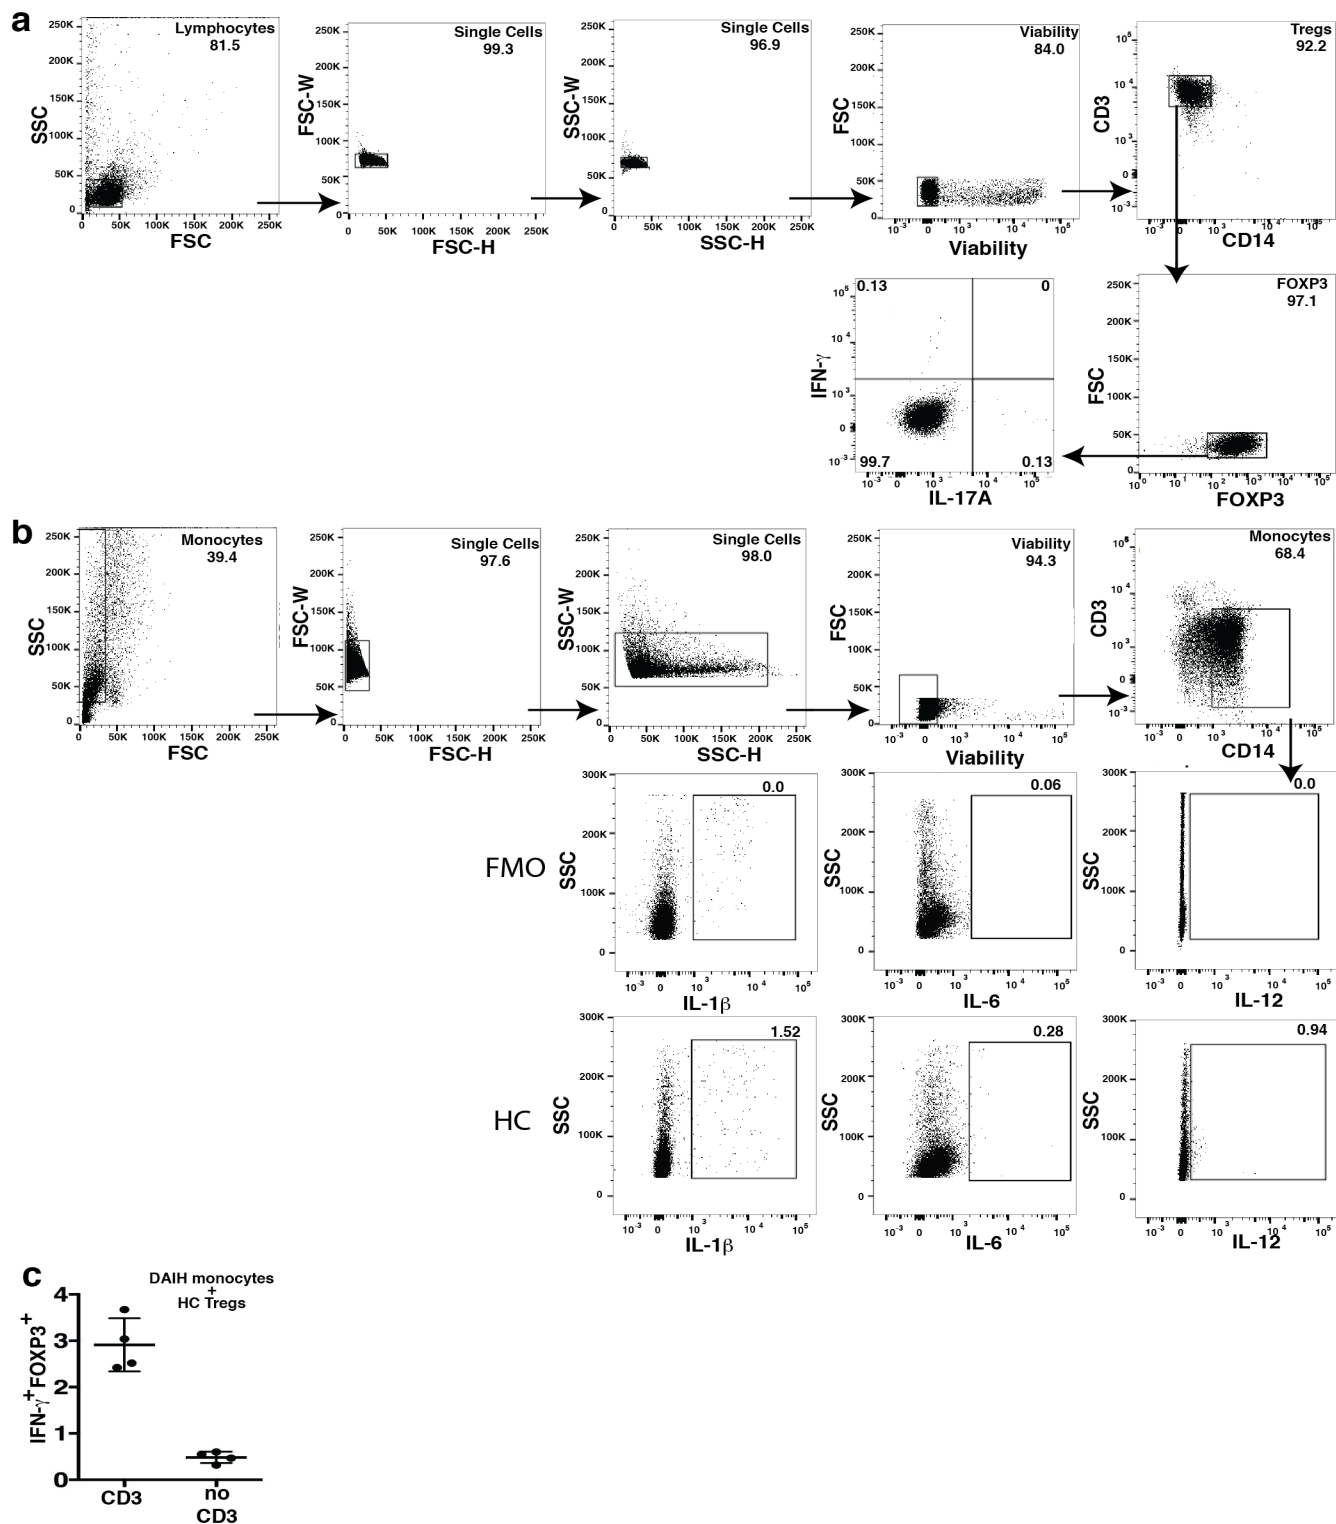

SUPPLEMENTARY FIGURE 4: Gating strategy for monocyte/Treg co-culture experiments. CD14<sup>+</sup> monocytes from healthy non-transplanted subjects (n=6), liver transplanted subjects without de novo autoimmune hepatitis (n=5) and subjects with de novo autoimmune hepatitis (n=5) were co-cultured with sorted Tregs from healthy non-transplanted subjects in the presence of plate bound anti-CD3 for 5-days and IL-17A and IFN- $\gamma$  secretion from FOXP3<sup>+</sup> Tregs was assessed using flow cytometry. Gating strategy for stimulated monocyte experiment. Monocytes from the above three groups were also stimulated with LPS for 24-hours and stained with anti-CD3, anti-CD14, intracellular cytokines IL-12, IL-6 and IL-1 $\beta$ . Cytokine secretion analyzed using flow cytometry. A) Forward and side scatter identified lymphocyte population; single cells were next gated on using FSC-W vs. FSC-H and SSC-W vs. SSC-H, viable cells were gated on, and of these, CD3 vs. CD14, CD14-CD3<sup>+</sup> cells were gated on, and of these, FOXP3<sup>+</sup> cells were gated on, and of these, IFN- $\gamma$  vs. IL-17. Gate placement determined using stimulated healthy control Tregs alone sample. B) Forward and side scatter identified monocyte population; single cells were next gated on using FSC-W vs. FSC-H and SSC-W vs. SSC-H, viable cells were gated on, and of these, CD14<sup>+</sup> and CD3<sup>-</sup> cells were gated upon; of these, SSC-A vs IL-12, IL-6 and IL-1 $\beta$  identified. Gate placement for cytokines determined by FMO. C) Absence of cytokine production in the absence of plate bound anti-CD3 confirming that cytokine production from FOXP3<sup>+</sup> Tregs in the co-culture experiments with monocytes is not a result of allogeneity.
